# Supplementary material for: Bleomycin modulates amyloid aggregation in β-amyloid and hIAPP
Source: Royal Society of Chemistry journal article supplement (doi:10.1039/d0ra04949b), 2020-01-01

## SUPPORTING INFORMATION

### **Bleomycin modulates amyloid aggregation in $\beta$ -amyloid and hIAPP**

#### **Anchala Kumari**

1. Department of Biotechnology, Teri School of Advanced Studies, New Delhi-110070, India
  2. School of Biotechnology, Jawaharlal Nehru University, New Delhi-110067, India
- Email: anchala.choudhary27@gmail.com

#### **Ritika Sharma**

School of Biotechnology, Jawaharlal Nehru University, New Delhi-110067, India  
Email: sharma.ritika198@gmail.com

#### **Nidhi Shrivastava**

School of Biotechnology, Jawaharlal Nehru University, New Delhi-110067, India  
Email: nidhineha002@gmail.com

#### **Pallavi Somvanshi**

Department of Biotechnology, Teri School of Advanced Studies, New Delhi-110070, India  
Email: psomvanshi@gmail.com

#### **Abhinav Grover**

School of Biotechnology, Jawaharlal Nehru University, New Delhi-110067, India  
Email: abhinavgr@gmail.com

#### **\*Corresponding Author**

Dr. Pallavi Somvanshi  
Associate Professor  
Department of Biotechnology, Teri School of Advanced Studies, New Delhi-110070, India  
Tel No.: +91-9899931682  
Email address: psomvanshi@gmail.com

Dr. Abhinav Grover  
Assistant Professor  
School of Biotechnology, Jawaharlal Nehru University, New Delhi, India  
Tel No.: +91-8130738032  
Fax: +91-11-26702040  
Email address: abhinavgr@gmail.com

## Supplementary Figure

**Figure S1** - Secondary structure analysis showing detailed residue specific probability % of B-Bridge, Bend, Turn, 3-Helix and 5-Helix for A-Beta and hIAPP in presence and absence of BLM.

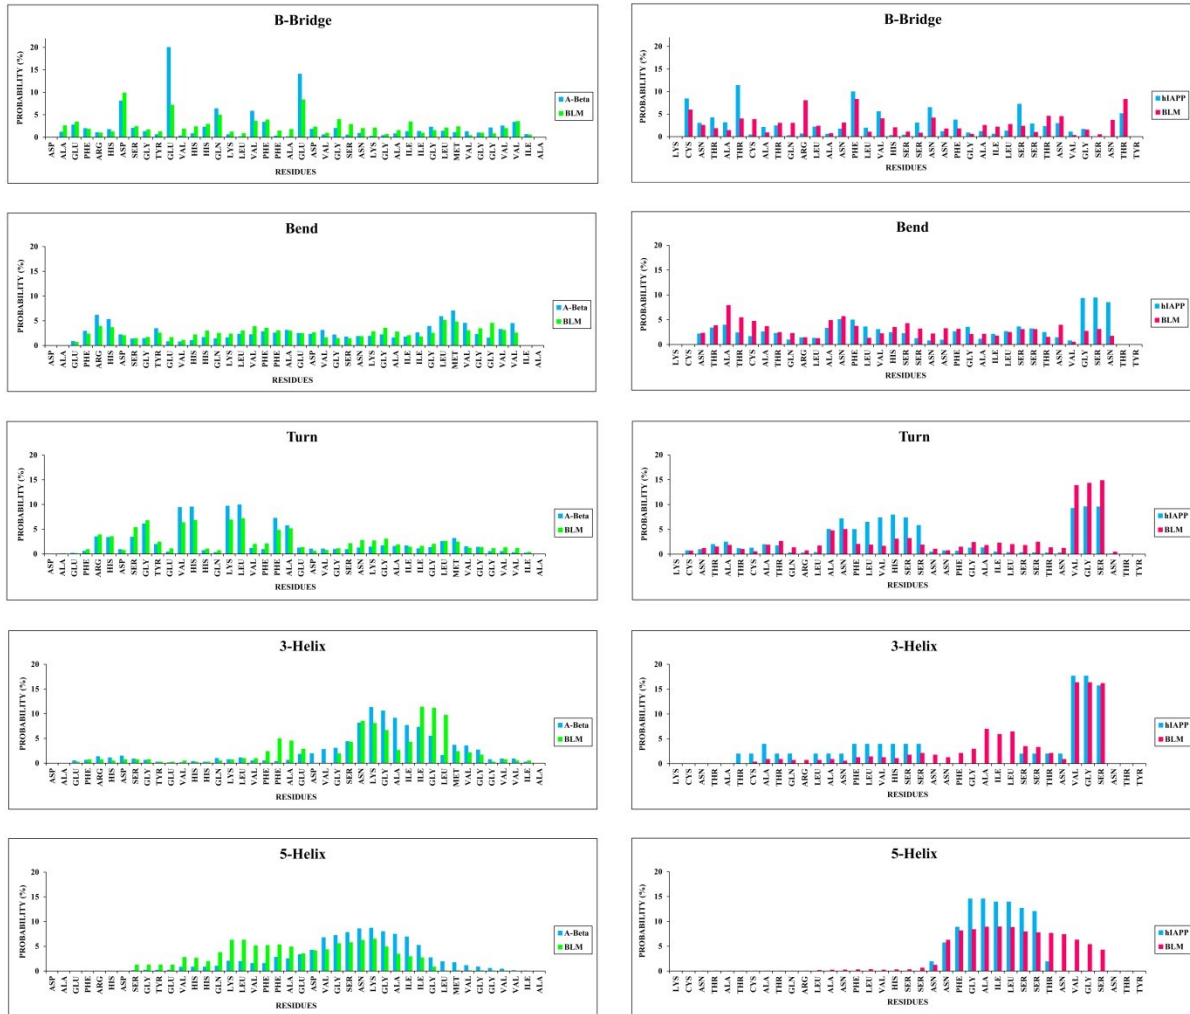

**Figure S2** - Statistical analysis for the efficiency of fibrillization inhibition (%) on the acquired ThT data revealing the effectiveness of BLM treatment. BLM was found less efficient in countering its aggregation in case of hIAPP as compared to A $\beta$ .

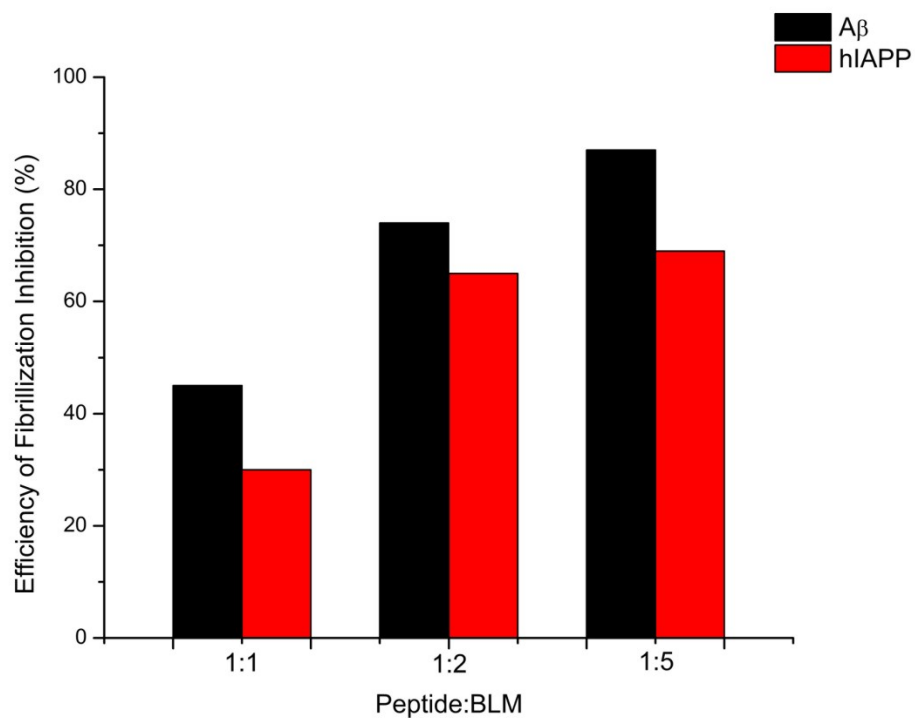

**Figure S3** - Statistical Paired T-test analysis implemented at 170 hrs for A $\beta$  and 1.1h for hIAPP in presence of BLM with respect to control i.e Buffer. The significance level confirmed by means of two-tailed T-test and successive p-value determination (described as \*p<0.05, \*\*p<0.01, and \*\*\*p<0.001).

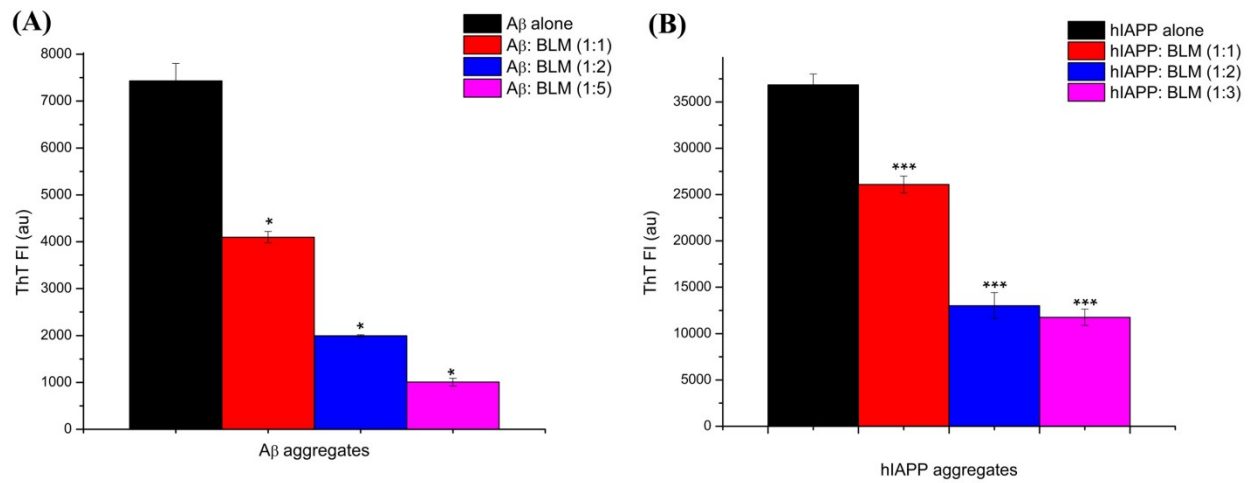

Supplement: d0ra04949b1.pdf [file d0ra04949b1.pdf]
